# Supplementary material for: A comparative analysis of human adult testicular cells expressing stem Leydig cell markers in the interstitium, vasculature, and peritubular layer
Source: PubMed Central journal article supplement — Andrology. 2020 Jun 1;8(5):1265–76. doi: 10.1111/andr.12817 (PMC7496384; doi:10.1111/andr.12817), 2020-06-01
Supplement: ANDR-8-1265-s002.pdf [file ANDR-8-1265-s002.pdf]

# Supplementary Figure 2

— IgG control  
— sample

## B

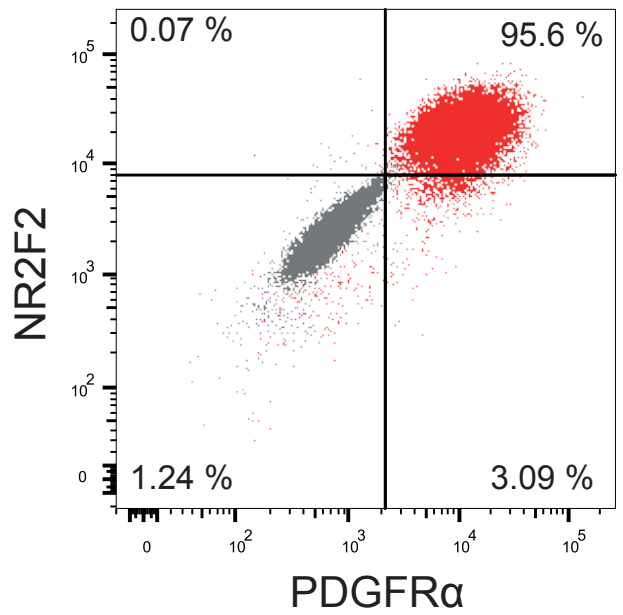

## A

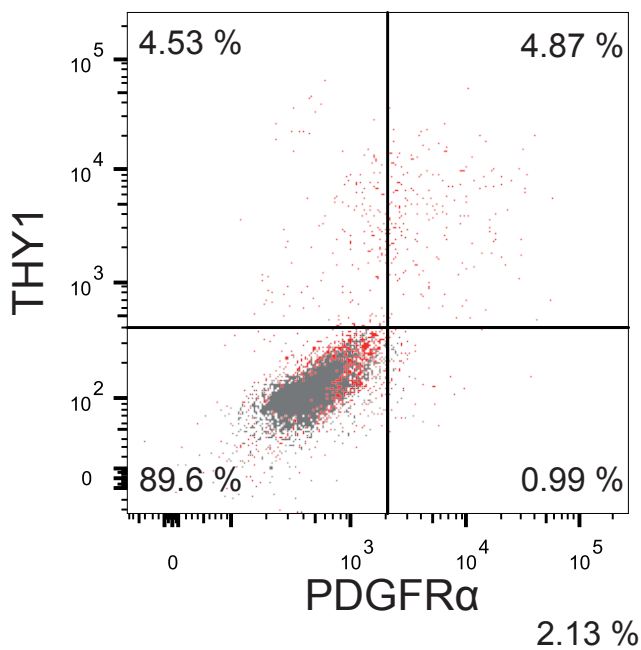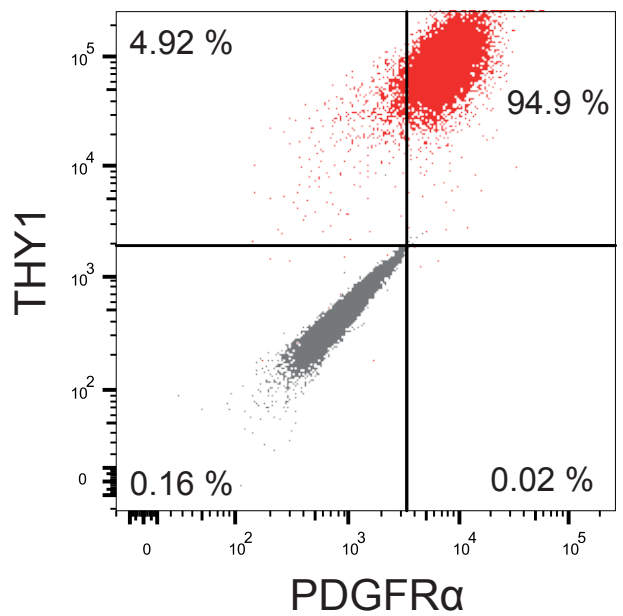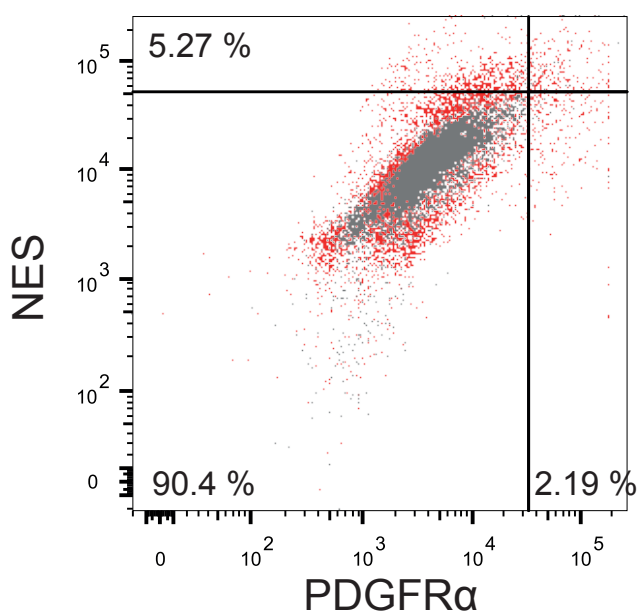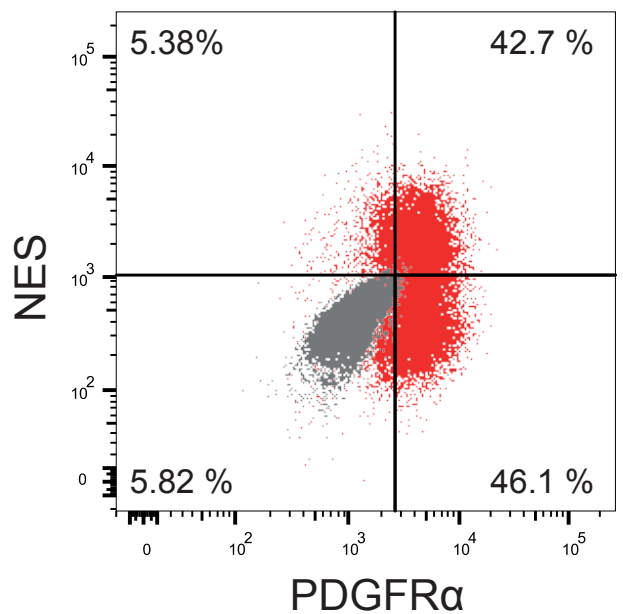

**Figure S2: Distribution of single and double positive cells of putative stem Leydig cell markers in relation to PDGFR $\alpha$**

Figures of representative FACS analyses of cells after isolation (a), and cells after 3.5 weeks of culture (b).
