# Supplementary material for: A comparative analysis of human adult testicular cells expressing stem Leydig cell markers in the interstitium, vasculature, and peritubular layer
Source: PubMed Central journal article supplement — Andrology. 2020 Jun 1;8(5):1265–76. doi: 10.1111/andr.12817 (PMC7496384; doi:10.1111/andr.12817), 2020-06-01
Supplement: ANDR-8-1265-s003.pdf [file ANDR-8-1265-s003.pdf]

# Supplementary figure 3

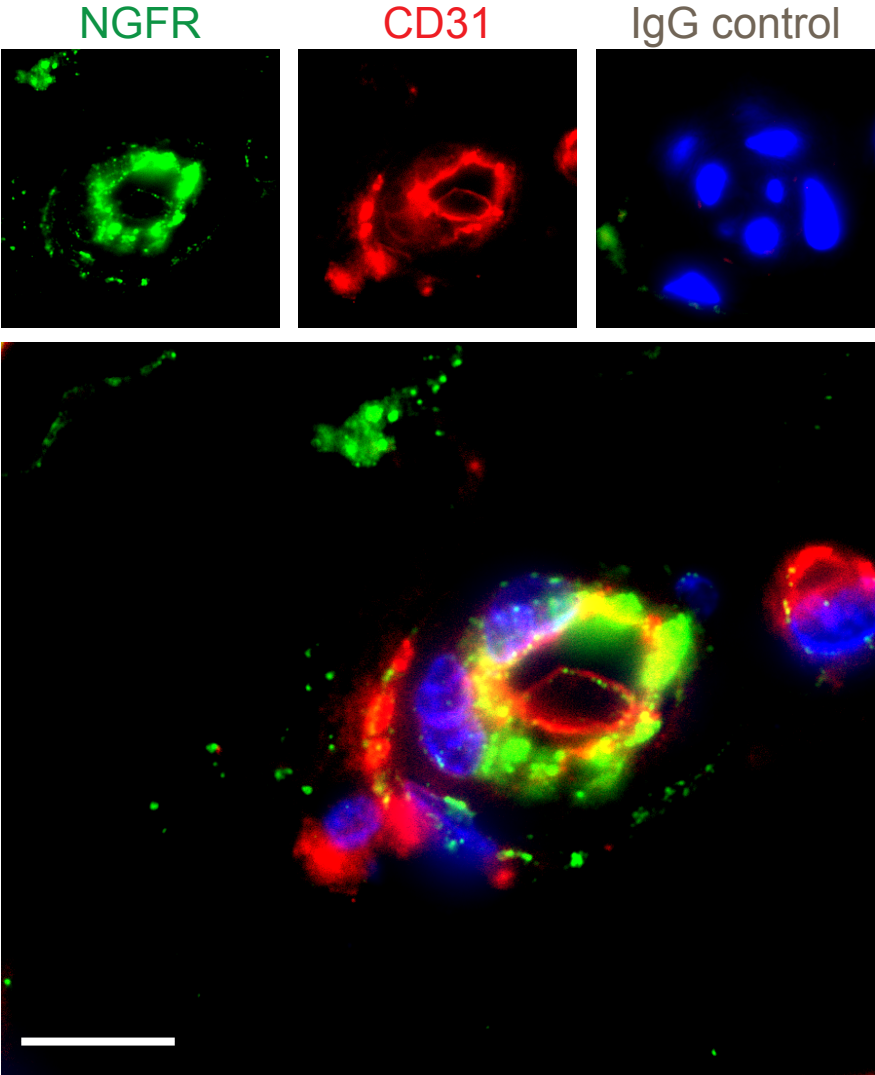

**Figure S3: Immunofluorescence NGFR and CD31**  
Co-localization of NGFR positive cells and CD31, an endothelial cell marker. Bar is 10  $\mu$ m
